# Supplementary material
Source: Royal Society of Chemistry journal article supplement (doi:10.1039/d6sm00198j)
Supplement: d6sm00198j1.pdf [file d6sm00198j1.pdf]

## Supporting Information

### Modeling elastoviscoplastic materials using physics-informed neural networks

Babak Valipour Goodarzi, Reza Foudazi\*

*School of Sustainable Chemical, Biological and Materials Engineering, The University of Oklahoma, Norman, OK,*

*USA*

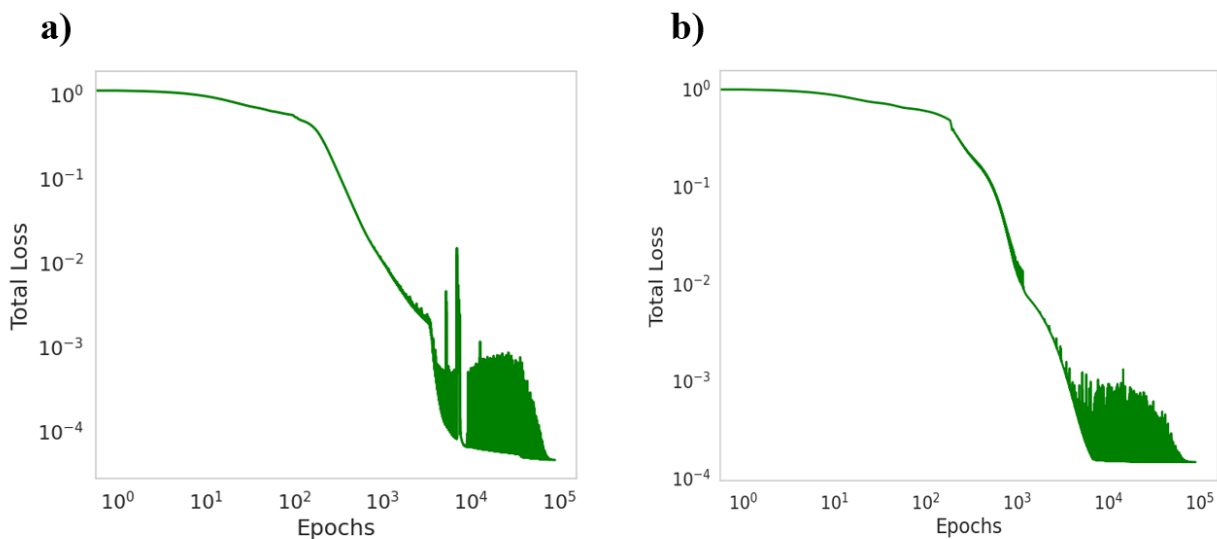

**Fig. S1.** a) loss optimization of the PINN fitting with respect to epochs for synthetic stress data example with following parameters: a)  $\lambda=0.05$  s,  $\tau_0=75$  Pa,  $\eta_p=20$  Pa.s, and  $\eta=10$  Pa.s, and b)  $\lambda=0.1$  s,  $\tau_0=25$  Pa,  $\eta_p=10$  Pa.s, and  $\eta=20$  Pa.s

---

\* Corresponding author. Email: [rfoudazi@ou.edu](mailto:rfoudazi@ou.edu).

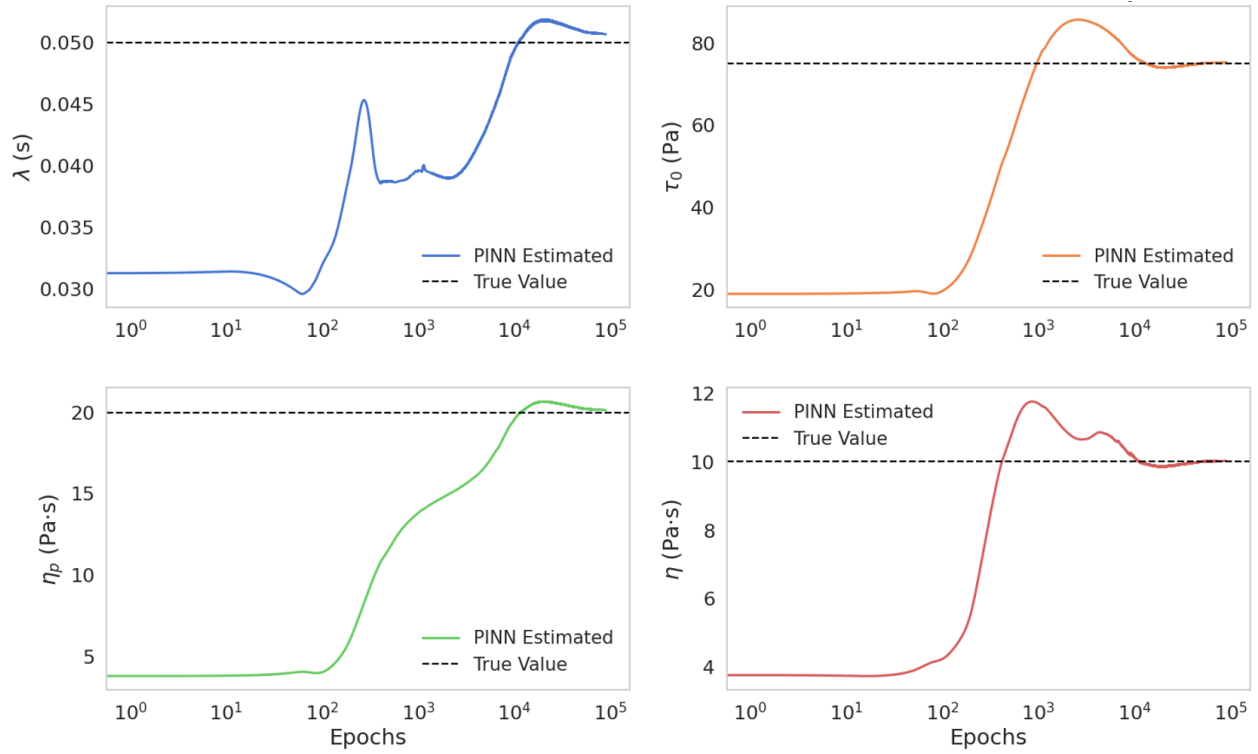

**Fig. S2.** Evolution of fitting parameters of the Saramito model with respect to epochs in comparison to the original constant values of the example model for synthetic data based on  $\lambda=0.05$  s,  $\tau_0=75$  Pa,  $\eta_p=20$  Pa.s, and  $\eta=10$  Pa.s

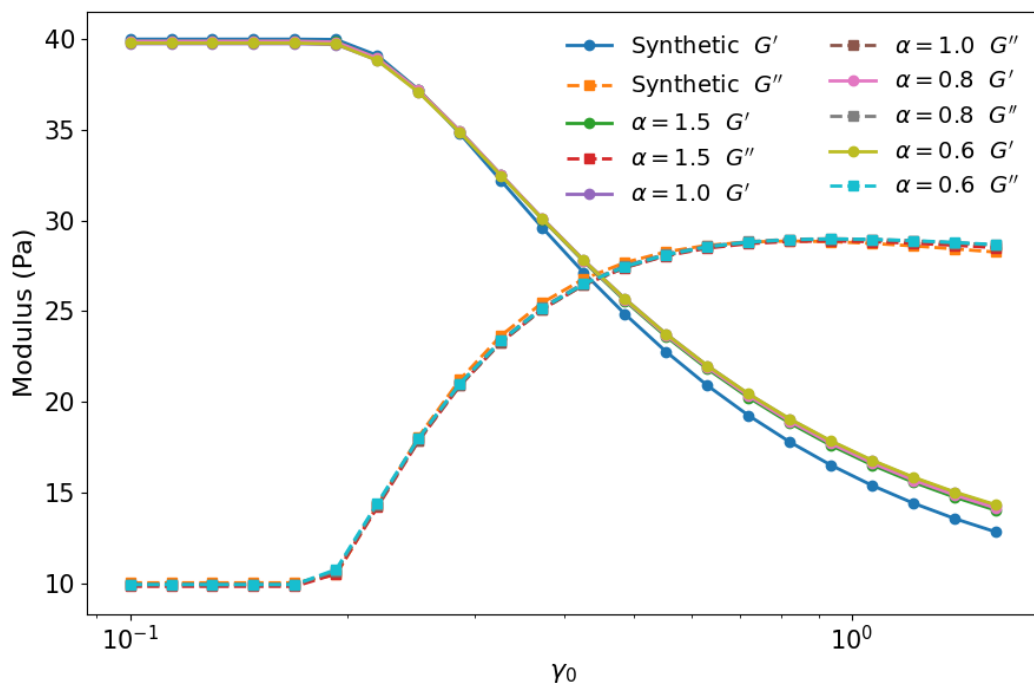

**Fig. S3.** Comparison of the loss and elastic moduli of the synthetic data generated from  $\lambda=0.05$  s,  $\tau_0=75$  Pa,  $\eta_p=20$  Pa.s, and  $\eta=10$  Pa.s, and the fitted model based on various values of  $\alpha$

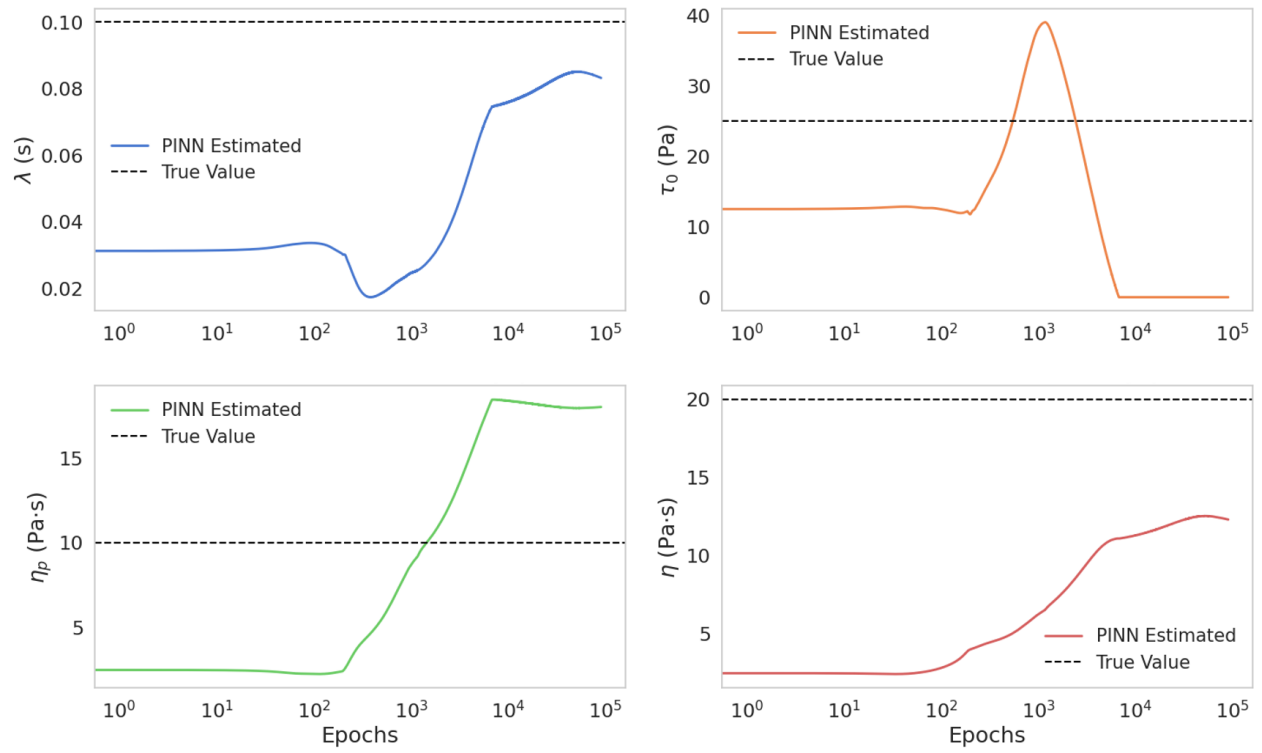

**Fig. S4.** Evolution of fitting parameters of the Saramito model with respect to epochs in comparison to the original constant values of the example model for synthetic data with  $\lambda=0.1$  s,  $\tau_0=25$  Pa,  $\eta_p=10$  Pa.s, and  $\eta=20$  Pa.s

**Table S1.** Fitted parameters of the classic Saramito model to the nanoemulsion sample at 10 rad/s and the strain amplitude of 0.5, regarding different fitting methods

| <b>Method</b>                   | $\lambda$ (s) | $\eta_p$ (Pa·s) | $\tau_0$ (Pa) | $\eta$ (Pa·s) | <b>G (Pa)</b> | <b>MSE</b>             |
|---------------------------------|---------------|-----------------|---------------|---------------|---------------|------------------------|
| <b>PINN</b>                     | 0.0097        | 35.13           | 167.35        | 26.69         | 3612.06       | $3.082 \times 10^{-2}$ |
| <b>Gradient descent</b>         | diverge       | diverge         | diverge       | diverge       | diverge       | -                      |
| <b>Levenberg-<br/>Marquardt</b> | 0.0051        | 11.91           | inf           | 45.83         | 233.53        | $6.938 \times 10^{-2}$ |
| <b>Nelder-Mead</b>              | diverge       | diverge         | diverge       | diverge       | diverge       | -                      |
